# Supplementary material for: NaHS Protects against the Impairments Induced by Oxygen-Glucose Deprivation in Different Ages of Primary Hippocampal Neurons
Source: PubMed Central journal article supplement (PMC5339257; doi:10.3389/fncel.2017.00067), 2017-03-07
Supplement: Image_1.pdf [file Image_1.pdf]

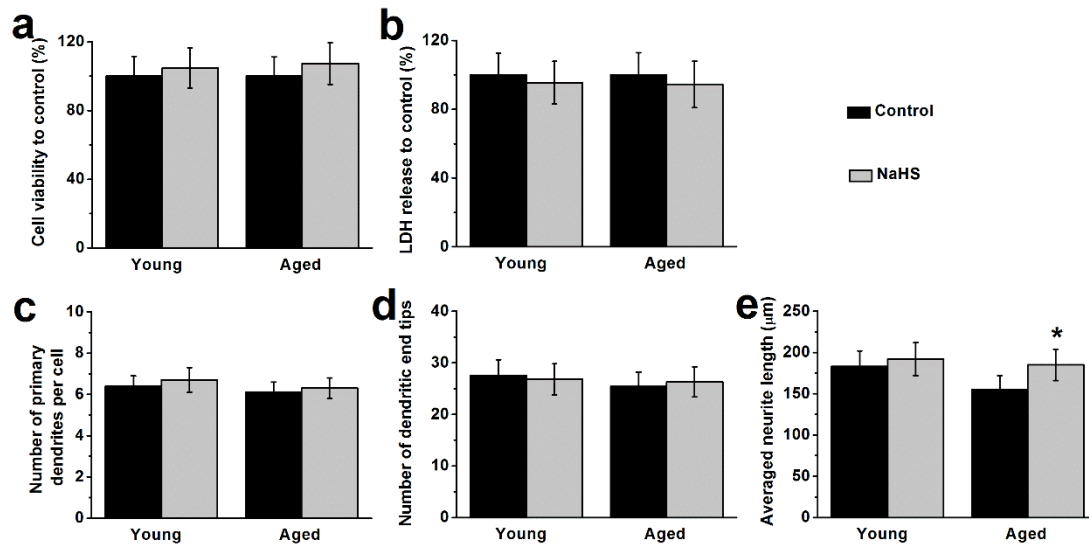

**Figure S1.** Effects of NaHS treatment (250  $\mu$ M) on cell viability (a), LDH release (b), the number of primary dendrites per cell (c), the number of dendritic end tips (d) and the average neurite length (e) in the young and aged hippocampal neurons in 7 DIV under normal condition (no OGD treatment). Data were presented by the mean  $\pm$  SD.

\*  $p < 0.05$  versus corresponding control.
